# Supplementary material for: Plasma Clearance of Coagulation Factor VIII and Extension of Its Half-Life for the Therapy of Hemophilia A: A Critical Review of the Current State of Research and Practice
Source: MDPI journal article supplement (doi:10.3390/ijms24108584), 2023-05-11
Supplement: s1 [file s1]

| From Church et al, 2018 [106]                                                                 |              | Spiked FVIII Recovery (%) |      |      |         |
|-----------------------------------------------------------------------------------------------|--------------|---------------------------|------|------|---------|
|                                                                                               | FVIII Spiked | 0.04                      | 0.4  | 0.9  | (IU/mL) |
| Bay 94-9027                                                                                   | OC           | 107                       | 92   | 78   |         |
|                                                                                               | CS           | 107                       | 120  | 118  |         |
|                                                                                               | OC/CS        | 1.00                      | 0.77 | 0.66 |         |
|                                                                                               |              |                           |      |      |         |
| FL-FVIII                                                                                      | OC           | 122                       | 105  | 100  |         |
|                                                                                               | CS           | 92                        | 102  | 110  |         |
|                                                                                               | OC/CS        | 1.33                      | 1.03 | 0.91 |         |
|                                                                                               |              |                           |      |      |         |
| Bay 94-9027 OC/CS difference relatively FL-VIII OC/CS<br>(OC/CS_FL-FVIII - OC/CS_Bay 94-9027) |              | 0.33                      | 0.26 | 0.25 |         |

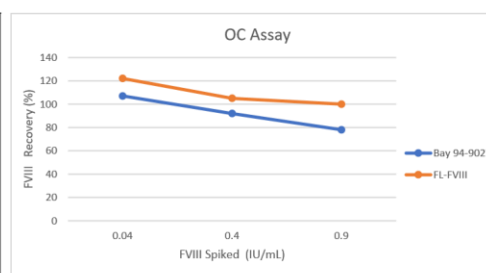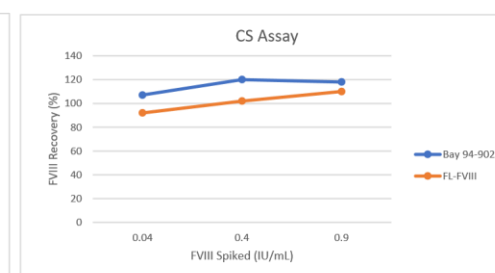

| From Tiefenbacher et al, 2019 [110]                                               |              | Spiked FVIII Recovery (%) |       |       |       |         |
|-----------------------------------------------------------------------------------|--------------|---------------------------|-------|-------|-------|---------|
|                                                                                   | FVIII Spiked | 0.03                      | 0.2   | 0.6   | 0.9   | (IU/mL) |
| N8-GP                                                                             | OC           | 101.7                     | 95.3  | 87.7  | 86.1  |         |
|                                                                                   | CS           | 119.1                     | 130.5 | 135   | 132.7 |         |
|                                                                                   | OC/CS        | 0.85                      | 0.73  | 0.65  | 0.65  |         |
|                                                                                   |              |                           |       |       |       |         |
| FL-FVIII                                                                          | OC           | 146.1                     | 124.2 | 114.2 | 109.1 |         |
|                                                                                   | CS           | 123.5                     | 126   | 132.5 | 127.9 |         |
|                                                                                   | OC/CS        | 1.18                      | 0.99  | 0.86  | 0.85  |         |
|                                                                                   |              |                           |       |       |       |         |
| N8-GP OC/CS difference relatively FL-VIII OC/CS<br>(OC/CS_FL-FVIII - OC/CS_N8-GP) |              | 0.33                      | 0.26  | 0.21  | 0.20  |         |

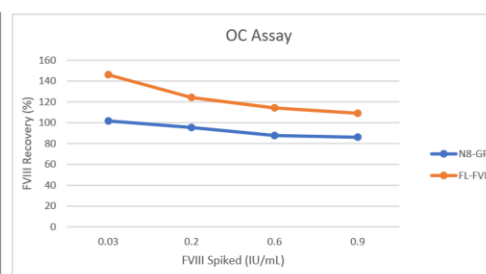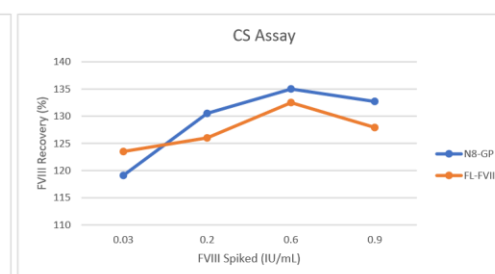

**Figure S1.** Analysis of plasma samples spiked with selected FVIII variants using OC and CS assays.

The data for the FVIII variants recovery by OC and CS assays were taken from the original papers (Church et al. [106] and Tiefenbacher et al. [110]) and reprocessed as shown.
